# Supplementary material for: Sex-Specific Relationships between HDL-Cholesterol Levels and 10-Year Mortality in Individuals with Atherosclerotic Cardiovascular Disease: A Nationwide Cohort Study of South Koreans
Source: MDPI journal article supplement (doi:10.3390/metabo13121175), 2023-11-26
Supplement: s1 [file s1]

**Table S1.** The missing numbers

|                            | <b>Total</b>           | <b>Low</b>                     | <b>High</b>                      | <b>Extremely high</b>         |
|----------------------------|------------------------|--------------------------------|----------------------------------|-------------------------------|
|                            | <b>(N = 1,711,548)</b> | <b>HDL-C<br/>(N = 477,346)</b> | <b>HDL-C<br/>(N = 1,215,741)</b> | <b>HDL-C<br/>(N = 18,461)</b> |
| Body mass index, N (%)     | 1158 (0.07)            | 566 (0.12)                     | 588 (0.05)                       | 4 (0.02)                      |
| Male, N                    | 411                    | 134                            | 276                              | 1                             |
| Female, N                  | 747                    | 432                            | 312                              | 3                             |
| Waist circumference, N (%) | 1185 (0.07)            | 553 (0.12)                     | 628 (0.05)                       | 4 (0.02)                      |
| Male, N                    | 444                    | 128                            | 315                              | 1                             |
| Female, N                  | 741                    | 425                            | 313                              | 3                             |
| Smoking, N (%)             | 3771 (0.22)            | 983 (0.21)                     | 2757 (0.23)                      | 31 (0.17)                     |
| Male, N                    | 1555                   | 301                            | 1247                             | 7                             |
| Female, N                  | 2216                   | 682                            | 1510                             | 24                            |
| Alcohol, N (%)             | 4127 (0.24)            | 973 (0.20)                     | 3064 (0.25)                      | 90 (0.49)                     |
| Male, N                    | 1821                   | 316                            | 1472                             | 33                            |
| Female, N                  | 2306                   | 657                            | 1592                             | 57                            |
